# Supplementary material for: Detecting multivariate differentially expressed genes
Source: PubMed Central journal article supplement (PMC1885271; doi:10.1186/1471-2105-8-150), 2007-05-09

Supplementary figure 1

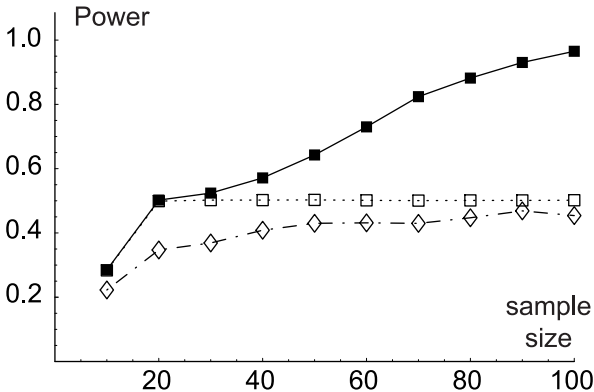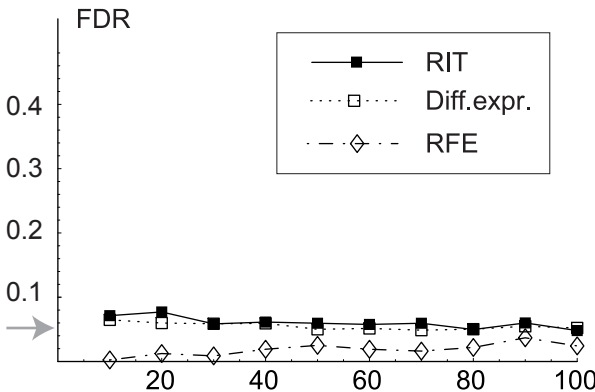

Supplement: 1471-2105-8-150-S2.pdf [file 1471-2105-8-150-S2.pdf]
