# Supplementary material for: Detecting multivariate differentially expressed genes
Source: PubMed Central journal article supplement (PMC1885271; doi:10.1186/1471-2105-8-150), 2007-05-09
Supplement: 1471-2105-8-150-S3.pdf [file 1471-2105-8-150-S3.pdf]

## Supplementary figure 2

```
Function RIT( $X, S, p, \phi, \alpha$ )  
Input: data  $X$ , set  $S \subset X$ , p-values  $p$ , test  $\phi$ , level  $\alpha$   
foreach  $X_j \notin S$  do  
  foreach  $X_i \in S$  do  
    Let  $p_{ij} = \phi(X_i, X_j)$ ;  
  end  
  Let  $p_j = |S| \min_i \max\{p_i, p_{ij}\}$  ; // Suppl. Theorem 4  
end  
Let  $p_j = |X \setminus S| p_j / r_j$  ; // Suppl. Lemma 3  
Let  $S' = \{X_j \notin S : p_j \leq \alpha\}$ ;  
if  $S' \neq \emptyset$  then  
   $p = \text{RIT}(X \setminus S, S', p, \phi, \alpha)$ ;  
end  
return  $p$  ; // Result is modified vector  $p$ 
```

Recursive Independence Test with FDR control. Assumes  $\phi$  returns p-values. Start with  $\text{RIT}(X \cup \{Y\}, \{Y\}, 0, \phi, \alpha)$ . Here  $p$  is a vector of p-values corresponding to the element of  $X$ .
